# Supplementary material for: Distinctive and functional pigment arrangements in Lhcp, a prasinophyte-specific light-harvesting complex
Source: Research Square preprint supplement (doi:10.21203/rs.3.rs-6886988/v1), 2025-09-11

Reporting Summary

Nature Portfolio wishes to improve the reproducibility of the work that we publish. This form provides structure for consistency and transparency in reporting. For further information on Nature Portfolio policies, see our Editorial Policies and the Editorial Policy Checklist.

Please do not complete any field with "not applicable" or n/a. Refer to the help text for what text to use if an item is not relevant to your study. For final submission: please carefully check your responses for accuracy; you will not be able to make changes later.

Statistics

For all statistical analyses, confirm that the following items are present in the figure legend, table legend, main text, or Methods section.

- |                                     |                                                                                                                                                                                                                                                                                     |
|-------------------------------------|-------------------------------------------------------------------------------------------------------------------------------------------------------------------------------------------------------------------------------------------------------------------------------------|
| n/a                                 | Confirmed                                                                                                                                                                                                                                                                           |
| <input type="checkbox"/>            | <input checked="" type="checkbox"/> The exact sample size (n) for each experimental group/condition, given as a discrete number and unit of measurement                                                                                                                             |
| <input type="checkbox"/>            | <input checked="" type="checkbox"/> A statement on whether measurements were taken from distinct samples or whether the same sample was measured repeatedly                                                                                                                         |
| <input checked="" type="checkbox"/> | <input type="checkbox"/> The statistical test(s) used AND whether they are one- or two-sided<br><i>Only common tests should be described solely by name; describe more complex techniques in the Methods section.</i>                                                               |
| <input checked="" type="checkbox"/> | <input type="checkbox"/> A description of all covariates tested                                                                                                                                                                                                                     |
| <input checked="" type="checkbox"/> | <input type="checkbox"/> A description of any assumptions or corrections, such as tests of normality and adjustment for multiple comparisons                                                                                                                                        |
| <input checked="" type="checkbox"/> | <input type="checkbox"/> A full description of the statistical parameters including central tendency (e.g. means) or other basic estimates (e.g. regression coefficient) AND variation (e.g. standard deviation) or associated estimates of uncertainty (e.g. confidence intervals) |
| <input checked="" type="checkbox"/> | <input type="checkbox"/> For null hypothesis testing, the test statistic (e.g. F, t, r) with confidence intervals, effect sizes, degrees of freedom and P value noted<br><i>Give P values as exact values whenever suitable.</i>                                                    |
| <input checked="" type="checkbox"/> | <input type="checkbox"/> For Bayesian analysis, information on the choice of priors and Markov chain Monte Carlo settings                                                                                                                                                           |
| <input checked="" type="checkbox"/> | <input type="checkbox"/> For hierarchical and complex designs, identification of the appropriate level for tests and full reporting of outcomes                                                                                                                                     |
| <input checked="" type="checkbox"/> | <input type="checkbox"/> Estimates of effect sizes (e.g. Cohen's d, Pearson's r), indicating how they were calculated                                                                                                                                                               |

Our web collection on statistics for biologists contains articles on many of the points above.

Software and code

Policy information about availability of computer code

- |                 |                                                                                         |
|-----------------|-----------------------------------------------------------------------------------------|
| Data collection | CRYO ARM 300 II equipped with a cold field-emission electron detector camera, Serial-EM |
| Data analysis   | cryoSPARC ver. 4.2.1., WinCOOT 0.9.447, Phenix 1.19-41584, Chimera and ChimeraX,        |

For manuscripts utilizing custom algorithms or software that are central to the research but not yet described in published literature, software must be made available to editors and reviewers. We strongly encourage code deposition in a community repository (e.g. GitHub). See the Nature Portfolio guidelines for submitting code & software for further information.

Data

Policy information about availability of data

- All manuscripts must include a data availability statement. This statement should provide the following information, where applicable:
- Accession codes, unique identifiers, or web links for publicly available datasets
  - A description of any restrictions on data availability
  - For clinical datasets or third party data, please ensure that the statement adheres to our policy

The map with C3 symmetry has been deposited in the Electron Microscopy Data Bank under accession codes EMD-39303. Coordinate data for the structures of Lhcp has been deposited in the PDB under accession codes 8YHY.

## Research involving human participants, their data, or biological material

Policy information about studies with [human participants or human data](#). See also policy information about [sex, gender \(identity/presentation\), and sexual orientation](#) and [race, ethnicity and racism](#).

Reporting on sex and gender

N/A

Reporting on race, ethnicity, or other socially relevant groupings

N/A

Population characteristics

N/A

Recruitment

N/A

Ethics oversight

N/A

Note that full information on the approval of the study protocol must also be provided in the manuscript.

## Field-specific reporting

Please select the one below that is the best fit for your research. If you are not sure, read the appropriate sections before making your selection.

☒ Life sciences ☐ Behavioural & social sciences ☐ Ecological, evolutionary & environmental sciences

For a reference copy of the document with all sections, see [nature.com/documents/nr-reporting-summary-flat.pdf](https://www.nature.com/documents/nr-reporting-summary-flat.pdf)

## Life sciences study design

All studies must disclose on these points even when the disclosure is negative.

Sample size

No statistical method was used to predetermine the sample size. The number of micrographs collected was determined by the observed particle distribution per image at the necessary magnification (pixel size) for reconstructing density maps at near-atomic resolution, which is essential for unbiased model building and interpretation. Following dataset classification the remaining particles were sufficient for reconstructing a density map of the Lhcp trimer complex at a resolution of 1.94 Å with imposing C3 symmetry.

Data exclusions

No data was excluded from initial data processing. Exclusion was later performed by unbiased 2D and 3D classifications as part of the data processing pipelines. Particle classes that form features-enriched 2D class averages or 3D back projections were manually selected, combined and used for further rounds of 2D/3D classification and selection. Additional details can be found in Supplementary Figure S1 and Materials and Methods section.

Replication

N/A. Due to technical limitations, replication of the entire dataset for structural biology studies is not applicable. However, the 3D map reconstruction is based on a weighted average of thousands of individual particle images in the final dataset.

Randomization

As shown in Fig. S1, we used the gold standard Fourier Shell Correlation method to evaluate the resolution of the cryo-EM structures. This method involves splitting the dataset into two subsets (odd and even) and refining them independently. The splitting of the dataset is random.

Blinding

N/A.

## Behavioural & social sciences study design

All studies must disclose on these points even when the disclosure is negative.

Study description

N/A

Research sample

N/A

Sampling strategy

N/A

Data collection

N/A

Timing

N/A

Data exclusions

N/A

Non-participation

N/A

Randomization

N/A

# Ecological, evolutionary & environmental sciences study design

All studies must disclose on these points even when the disclosure is negative.

|                          |                                                                                                                                                                                        |
|--------------------------|----------------------------------------------------------------------------------------------------------------------------------------------------------------------------------------|
| Study description        | N/A.                                                                                                                                                                                   |
| Research sample          | <i>O. tauri</i> strain OTH95 was obtained from Roscoff Culture Collection (RCC745) and cultivated in the laboratory. Additional details can be found in Materials and Methods section. |
| Sampling strategy        | N/A                                                                                                                                                                                    |
| Data collection          | N/A                                                                                                                                                                                    |
| Timing and spatial scale | N/A                                                                                                                                                                                    |
| Data exclusions          | N/A                                                                                                                                                                                    |
| Reproducibility          | N/A                                                                                                                                                                                    |
| Randomization            | N/A                                                                                                                                                                                    |
| Blinding                 | N/A                                                                                                                                                                                    |

Did the study involve field work? ☐ Yes ☒ No

## Field work, collection and transport

|                        |     |
|------------------------|-----|
| Field conditions       | N/A |
| Location               | N/A |
| Access & import/export | N/A |
| Disturbance            | N/A |

## Reporting for specific materials, systems and methods

We require information from authors about some types of materials, experimental systems and methods used in many studies. Here, indicate whether each material, system or method listed is relevant to your study. If you are not sure if a list item applies to your research, read the appropriate section before selecting a response.

### Materials & experimental systems

| n/a                                 | Involved in the study                                  |
|-------------------------------------|--------------------------------------------------------|
| <input checked="" type="checkbox"/> | <input type="checkbox"/> Antibodies                    |
| <input checked="" type="checkbox"/> | <input type="checkbox"/> Eukaryotic cell lines         |
| <input checked="" type="checkbox"/> | <input type="checkbox"/> Palaeontology and archaeology |
| <input checked="" type="checkbox"/> | <input type="checkbox"/> Animals and other organisms   |
| <input checked="" type="checkbox"/> | <input type="checkbox"/> Clinical data                 |
| <input checked="" type="checkbox"/> | <input type="checkbox"/> Dual use research of concern  |
| <input checked="" type="checkbox"/> | <input type="checkbox"/> Plants                        |

### Methods

| n/a                                 | Involved in the study                           |
|-------------------------------------|-------------------------------------------------|
| <input checked="" type="checkbox"/> | <input type="checkbox"/> ChIP-seq               |
| <input checked="" type="checkbox"/> | <input type="checkbox"/> Flow cytometry         |
| <input checked="" type="checkbox"/> | <input type="checkbox"/> MRI-based neuroimaging |

## Antibodies

|                 |     |
|-----------------|-----|
| Antibodies used | N/A |
| Validation      | N/A |

## Eukaryotic cell lines

Policy information about [cell lines and Sex and Gender in Research](#)

|                                                                      |     |
|----------------------------------------------------------------------|-----|
| Cell line source(s)                                                  | N/A |
| Authentication                                                       | N/A |
| Mycoplasma contamination                                             | N/A |
| Commonly misidentified lines<br>(See <a href="#">ICLAC</a> register) | N/A |

## Palaeontology and Archaeology

|                                                                                                                                                 |     |
|-------------------------------------------------------------------------------------------------------------------------------------------------|-----|
| Specimen provenance                                                                                                                             | N/A |
| Specimen deposition                                                                                                                             | N/A |
| Dating methods                                                                                                                                  | N/A |
| <input type="checkbox"/> Tick this box to confirm that the raw and calibrated dates are available in the paper or in Supplementary Information. |     |
| Ethics oversight                                                                                                                                | N/A |

Note that full information on the approval of the study protocol must also be provided in the manuscript.

## Animals and other research organisms

Policy information about [studies involving animals](#); [ARRIVE guidelines](#) recommended for reporting animal research, and [Sex and Gender in Research](#)

|                         |     |
|-------------------------|-----|
| Laboratory animals      | N/A |
| Wild animals            | N/A |
| Reporting on sex        | N/A |
| Field-collected samples | N/A |
| Ethics oversight        | N/A |

Note that full information on the approval of the study protocol must also be provided in the manuscript.

## Clinical data

Policy information about [clinical studies](#)

All manuscripts should comply with the ICMJE [guidelines for publication of clinical research](#) and a completed [CONSORT checklist](#) must be included with all submissions.

|                             |     |
|-----------------------------|-----|
| Clinical trial registration | N/A |
| Study protocol              | N/A |
| Data collection             | N/A |
| Outcomes                    | N/A |

## Dual use research of concern

Policy information about [dual use research of concern](#)

### Hazards

Could the accidental, deliberate or reckless misuse of agents or technologies generated in the work, or the application of information presented in the manuscript, pose a threat to:

| No                                  | Yes                                                 |
|-------------------------------------|-----------------------------------------------------|
| <input checked="" type="checkbox"/> | <input type="checkbox"/> Public health              |
| <input checked="" type="checkbox"/> | <input type="checkbox"/> National security          |
| <input checked="" type="checkbox"/> | <input type="checkbox"/> Crops and/or livestock     |
| <input checked="" type="checkbox"/> | <input type="checkbox"/> Ecosystems                 |
| <input checked="" type="checkbox"/> | <input type="checkbox"/> Any other significant area |

## Experiments of concern

Does the work involve any of these experiments of concern:

| No                                  | Yes                                                                                                  |
|-------------------------------------|------------------------------------------------------------------------------------------------------|
| <input checked="" type="checkbox"/> | <input type="checkbox"/> Demonstrate how to render a vaccine ineffective                             |
| <input checked="" type="checkbox"/> | <input type="checkbox"/> Confer resistance to therapeutically useful antibiotics or antiviral agents |
| <input checked="" type="checkbox"/> | <input type="checkbox"/> Enhance the virulence of a pathogen or render a nonpathogen virulent        |
| <input checked="" type="checkbox"/> | <input type="checkbox"/> Increase transmissibility of a pathogen                                     |
| <input checked="" type="checkbox"/> | <input type="checkbox"/> Alter the host range of a pathogen                                          |
| <input checked="" type="checkbox"/> | <input type="checkbox"/> Enable evasion of diagnostic/detection modalities                           |
| <input checked="" type="checkbox"/> | <input type="checkbox"/> Enable the weaponization of a biological agent or toxin                     |
| <input checked="" type="checkbox"/> | <input type="checkbox"/> Any other potentially harmful combination of experiments and agents         |

## Plants

|                       |     |
|-----------------------|-----|
| Seed stocks           | N/A |
| Novel plant genotypes | N/A |
| Authentication        | N/A |

## ChIP-seq

### Data deposition

- ☐ Confirm that both raw and final processed data have been deposited in a public database such as [GEO](#).
- ☐ Confirm that you have deposited or provided access to graph files (e.g. BED files) for the called peaks.

|                                                                    |     |
|--------------------------------------------------------------------|-----|
| Data access links<br><i>May remain private before publication.</i> | N/A |
| Files in database submission                                       | N/A |
| Genome browser session<br>(e.g. <a href="#">UCSC</a> )             | N/A |

### Methodology

|                         |     |
|-------------------------|-----|
| Replicates              | N/A |
| Sequencing depth        | N/A |
| Antibodies              | N/A |
| Peak calling parameters | N/A |
| Data quality            | N/A |

Software

N/A

## Flow Cytometry

### Plots

Confirm that:

- ☐ The axis labels state the marker and fluorochrome used (e.g. CD4-FITC).
- ☐ The axis scales are clearly visible. Include numbers along axes only for bottom left plot of group (a 'group' is an analysis of identical markers).
- ☐ All plots are contour plots with outliers or pseudocolor plots.
- ☐ A numerical value for number of cells or percentage (with statistics) is provided.

### Methodology

Sample preparation

N/A

Instrument

N/A

Software

N/A

Cell population abundance

N/A

Gating strategy

N/A

- ☐ Tick this box to confirm that a figure exemplifying the gating strategy is provided in the Supplementary Information.

## Magnetic resonance imaging

### Experimental design

Design type

N/A

Design specifications

N/A

Behavioral performance measures

N/A

Imaging type(s)

N/A

Field strength

N/A

Sequence &amp; imaging parameters

N/A

Area of acquisition

N/A

Diffusion MRI

☐ Used☐ Not used

### Preprocessing

Preprocessing software

N/A

Normalization

N/A

Normalization template

N/A

Noise and artifact removal

N/A

Volume censoring

N/A

### Statistical modeling & inference

Model type and settings

N/A

Effect(s) tested

N/A

Specify type of analysis: ☐ Whole brain ☐ ROI-based ☐ Both

Statistic type for inference

N/A

(See [Eklund et al. 2016](#))

Correction

N/A

## Models & analysis

n/a | Involved in the study

- ☐ ☐ Functional and/or effective connectivity  
☐ ☐ Graph analysis  
☐ ☐ Multivariate modeling or predictive analysis

Functional and/or effective connectivity

N/A

Graph analysis

N/A

Multivariate modeling and predictive analysis

N/A

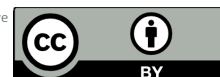

Supplement: Supplementary file 1 [file 2b5b4a0267379fc1f618702b.pdf]
