# Supplementary material for: Distinctive and functional pigment arrangements in Lhcp, a prasinophyte-specific light-harvesting complex
Source: Research Square preprint supplement (doi:10.21203/rs.3.rs-6886988/v1), 2025-09-11
Supplement: Supplementary file 2 [file 3e06d6028dd41adb152a3b32.pdf]

# Supporting Information for

Distinctive and functional pigment arrangements in Lhcp, a prasinophyte-specific light-harvesting complex.

Soichiro Seki<sup>1,2,\*</sup>, Masato Kubota<sup>3</sup>, Nami Yamano<sup>4,5</sup>, Eunchul Kim<sup>3,†</sup>, Asako Ishii<sup>3</sup>, Tomoko Miyata<sup>6,7</sup>, Hideaki Tanaka<sup>2</sup>, Richard J. Cogdell<sup>8</sup>, Jing-Ping Zhang<sup>5</sup>, Keiichi Namba<sup>7,9</sup>, Genji Kurisu<sup>2,7,9</sup>, Jun Minagawa<sup>3</sup>, and Ritsuko Fujii<sup>1,10,11,\*</sup>

**\*Corresponding authors.** Soichiro Seki and Ritsuko Fujii.

Email: s-seki@protein.osaka-u.ac.jp (SS), and ritsuko@omu.ac.jp (RF)

## This PDF file includes:

Supporting information Text 1 to 3

Figures S1 to S10

Tables S1 to S3

SI References

## Supporting Information Text 1. Structural identification of unidentified carotenoid.

The unidentified peak was collected from Lhcp purified with sucrose density gradient centrifugation. Pigments were extracted from lyophilized Lhcp, and purified using high-performance liquid chromatography (column, LiChrosorb Si-60, 10 ID x 250 mm; eluent, 15% (v/v) acetone in *n*-hexane) as described in Seki et al. 2022<sup>[1]</sup>. The UV-Vis absorption and CD spectra in *n*-hexane at room temperature were recorded by U-1800 (Shimadzu, Kyoto, Japan) and J-720W (JASCO Corporation, Tokyo, Japan), respectively. ESI-MS was recorded with positive ion mode using AccuTOF LC-plus JMS-T100LP (JEOL, Tokyo, Japan).

ESI-MS represents all the predicted signals listed in the following Table, including Na-adduct ions, confirming the chemical formula of C<sub>48</sub>H<sub>68</sub>O<sub>4</sub>. (See Fig. S4c)

Table. ESI-MS signals

| <i>m/z</i> (Obs.) | <i>m/z</i> (Calc.) | $\Delta$ [mDa] | $\Delta$ [ppm] | Ion                                |
|-------------------|--------------------|----------------|----------------|------------------------------------|
| 708.51194         | 708.51176          | 0.18           | 0.25           | [M] <sup>+</sup>                   |
| 709.51765         | 709.51512          | 2.53           | 3.57           | [MH] <sup>+</sup>                  |
| 710.52184         | 710.51847          | 3.37           | 4.74           | [MH <sub>2</sub> ] <sup>2+</sup>   |
| 731.50170         | 731.50153          | 0.17           | 0.23           | [MNa] <sup>+</sup>                 |
| 732.50428         | 732.50488          | -0.60          | -0.82          | [MHNa] <sup>+</sup>                |
| 733.50660         | 733.50824          | -1.64          | -2.24          | [MH <sub>2</sub> Na] <sup>2+</sup> |

Cryo-EM map shows the presence of a 3-acyloxy-5,6-epoxy ionone end group, allowing us to propose a structure of the carotenoid body as antheraxanthin B [(3*S*, 5*S*, 6*R*, 3'*R*)-5,6-epoxy-5,6-dihydro- $\beta$ - $\beta$ -carotene-3,3'-diol]<sup>[2]</sup>. The UV-VIS absorption (421.0, 444.6, and 473.7 nm with %III/II 71% in *n*-hexane) and circular dichroism (CD) profile (211 (+12), 231 (-16), 273 (+23), and 335 (-9) nm) were in good agreement with reported values<sup>[2-4]</sup>. The cryo-EM map also showed that the acyl group contains at least eight carbons. To fit the MS signal, we tentatively proposed a structure with a double bond at C2''=C3'' position based on observed short-chain acyl ester substitutions of carotenoids seen in marine green algae<sup>[5]</sup>. Overall, the absolute chemical structure of Uid was determined to be (3*S*,5*S*,6*R*,3'*R*)-5,6-epoxy-5,6-dihydro-3'-hydroxy-3-(2-octenoyloxy)- $\beta$ - $\beta$ -carotene, and the alternative name for this compound is 3-(2-octenoyl)-antheraxanthin B. The cryo-EM map corroborates the *cis* configuration at C8'-C9' single bond, i.e., 8'-*s-cis* configuration.

### **(3*S*,5*S*,6*R*,3'*R*)-5,6-epoxy-5,6-dihydro-3'-hydroxy-3-(2-octenoyloxy)- $\beta$ - $\beta$ -carotene.**

Available amount: ~0.005 mg. UV-VIS in nm: (*n*-hexane) 421, 445, 474, and %III/II = 71. CD in nm ( $\Delta\epsilon$  in mdeg): (*n*-hexane) 211 (+12), 231 (-16), 273 (+23), and 335 (-9). ESI-MS, *m/z* = 708.51194  $\pm$  0.00018 [M<sup>+</sup>], C<sub>48</sub>H<sub>68</sub>O<sub>4</sub>, *m/z* Calc. = 708.51176.

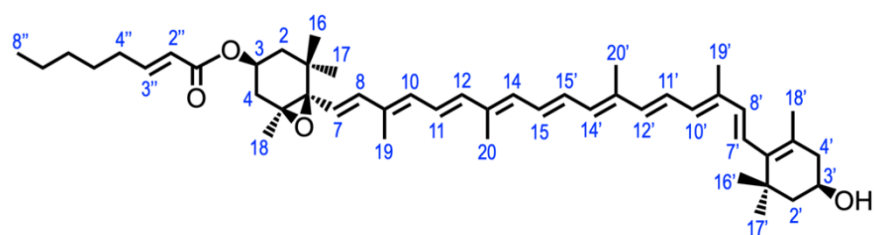

Figure. Chemical structure of 8'-s-cis form of 3-(2-octenoyl)-antheraxanthin B

## Supporting Information Text 2: Excitonic coupling calculations and the constant for Dvp.

To estimate the excitonic coupling between chlorophyll molecules within and between monomers of the trimeric complex based on Amerongen and Grondelle 2001<sup>[6]</sup>, we implemented a custom Python script. The calculations account for the Mg-Mg distances as well as transition dipole moment vectors between chlorophylls, including Chl *a* (CLA), Chl *b* (CHL), and Dvp. For each pair of chlorophyll molecules, excitonic coupling values were calculated using the formula:

$$V = \frac{C \cdot \kappa}{R^3}$$

where:

*V* is the excitonic coupling constant in cm<sup>-1</sup>

$\kappa$  is the orientation factor between the transition dipole moments of the two molecules

*R* is the Mg-Mg distance between the two molecules in nanometers.

*C* is a constant that equals (5.04 f<sub>1</sub><sup>2</sup> μ<sup>2</sup>)/ε<sub>r</sub> in Amerongen and Grondelle 2001<sup>[6]</sup>. The values depend on the types of chlorophylls involved (90 cm<sup>-1</sup> nm<sup>3</sup> for CLA-CLA, 75 cm<sup>-1</sup> nm<sup>3</sup> for CLA-CHL, and 63 cm<sup>-1</sup> nm<sup>3</sup> for CHL-CHL). This constant correlates with the dipole strength<sup>[6]</sup>. Thus, we calculated the ratio of the molar extinction coefficients based on the absorption spectral intensities between Chl *a* and Dvp<sup>[7]</sup> and determined the constant of CLA-Dvp as 64 cm<sup>-1</sup> nm<sup>3</sup>, that of CHL-Dvp as 54 cm<sup>-1</sup> nm<sup>3</sup>.

For each chlorophyll pair, the transition dipole moments were derived from the atomic coordinates of the nitrogen atoms in the porphyrin ring (ND and NB for CLA and CHL; N9 and N21 for DVP). Calculations were performed for all intra-monomer and inter-monomer pairs, averaging the results over the three monomer-monomer interfaces in the trimer.

**Supporting Information Text 3. Parameters to calculate the electronic coupling based on dipole-dipole approximation.**

Values of angles ( $\theta_{AB}$ ,  $\theta_A$ , and  $\theta_B$ ) in degrees and a distance ( $R_{AB}$ ) in Å between two dipoles ( $\mu_A$  and  $\mu_B$ ) were measured using ChimeraX software based on the definitions given in the right figure.

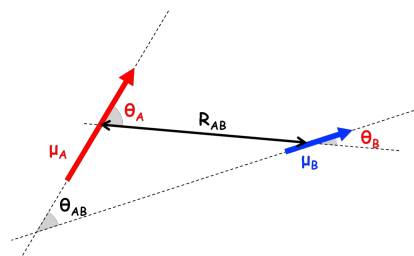

Table. Angles from 3D structure of Lhcp and calculated orientation factor and coupling.

| dipole A       | dipole B                             | $\theta_{AB}$ | $\theta_A$ | $\theta_B$ | $R_{AB}$ | $\kappa^{*1}$ | $V_{DD}^{*2}$ |
|----------------|--------------------------------------|---------------|------------|------------|----------|---------------|---------------|
| Uri: C9→C9'    | b603: N <sub>B</sub> →N <sub>D</sub> | 163           | 91         | 104        | 6.5      | -0.97         | -229          |
|                | a602: N <sub>B</sub> →N <sub>D</sub> | 133           | 35         | 46         | 10.1     | -2.40         | -181          |
|                | b607: N <sub>B</sub> →N <sub>D</sub> | 44            | 148        | 20         | 15.1     | 3.11          | 58            |
| Pra-1: C7'→C9  | a612: N <sub>B</sub> →N <sub>D</sub> | 105           | 73         | 32         | 5.5      | -0.99         | 475           |
|                | a610: N <sub>B</sub> →N <sub>D</sub> | 42            | 148        | 39         | 8.9      | 2.71          | 298           |
| Mic: C8→C9'    | b614: N <sub>B</sub> →N <sub>D</sub> | 116           | 114        | 154        | 8.2      | -1.53         | -175          |
|                | a611: N <sub>B</sub> →N <sub>D</sub> | 124           | 34         | 77         | 15.3     | -1.13         | -25           |
| Pra-2: C9'→C13 | a608: N <sub>B</sub> →N <sub>D</sub> | 62            | 21         | 98         | 14.3     | 0.85          | 128           |

<sup>\*1</sup>  $\kappa$  was calculated according to the equation,  $\kappa = \cos\theta_{AB} - 3\cos\theta_A\cos\theta_B$ .

<sup>\*2</sup>  $V_{DD}$  in cm<sup>-1</sup> was calculated according to the equation,  $V_{DD} = \frac{|\mu_A||\mu_B|\kappa}{4\pi\epsilon_0 R_{AB}^3}$ , using the following transition dipole strengths ( $|\mu|$ ): 4.6 D and 3.8 D for the Q<sub>y</sub> transitions of Chl *a* and Chl *b* (based on the experimentally determined value in vacuum<sup>[8]</sup>), and 3.0 D for the S<sub>1</sub>-S<sub>0</sub> transition of the carbonyl carotenoids (based on the reported value for the S<sub>1</sub>-S<sub>0</sub> transition of peridinin<sup>[9]</sup>).

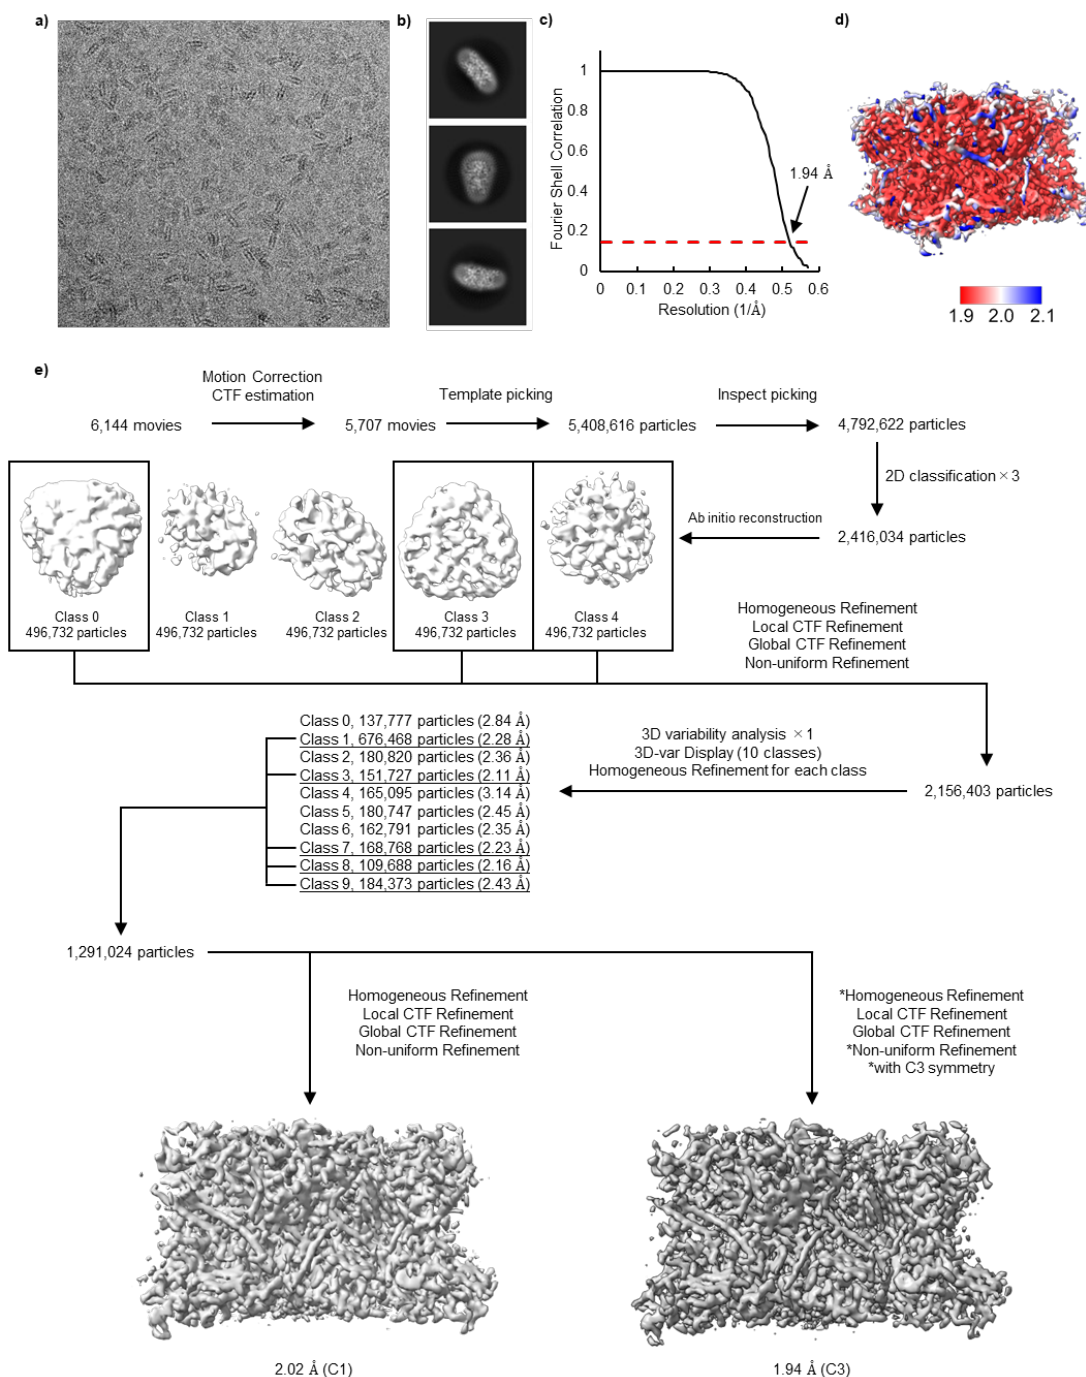

**Fig. S1. Cryo-EM data processing procedure.** Cryo-EM micrographs (a) and representative merged images (b) of Lhcp trimer were extracted. The resolution of the cryo-EM map was determined using an FSC value equal to 0.143 (c). Local resolution of the electron potential map with imposing  $C_3$  symmetry (d). A detailed procedure for the construction of 3D data (e).

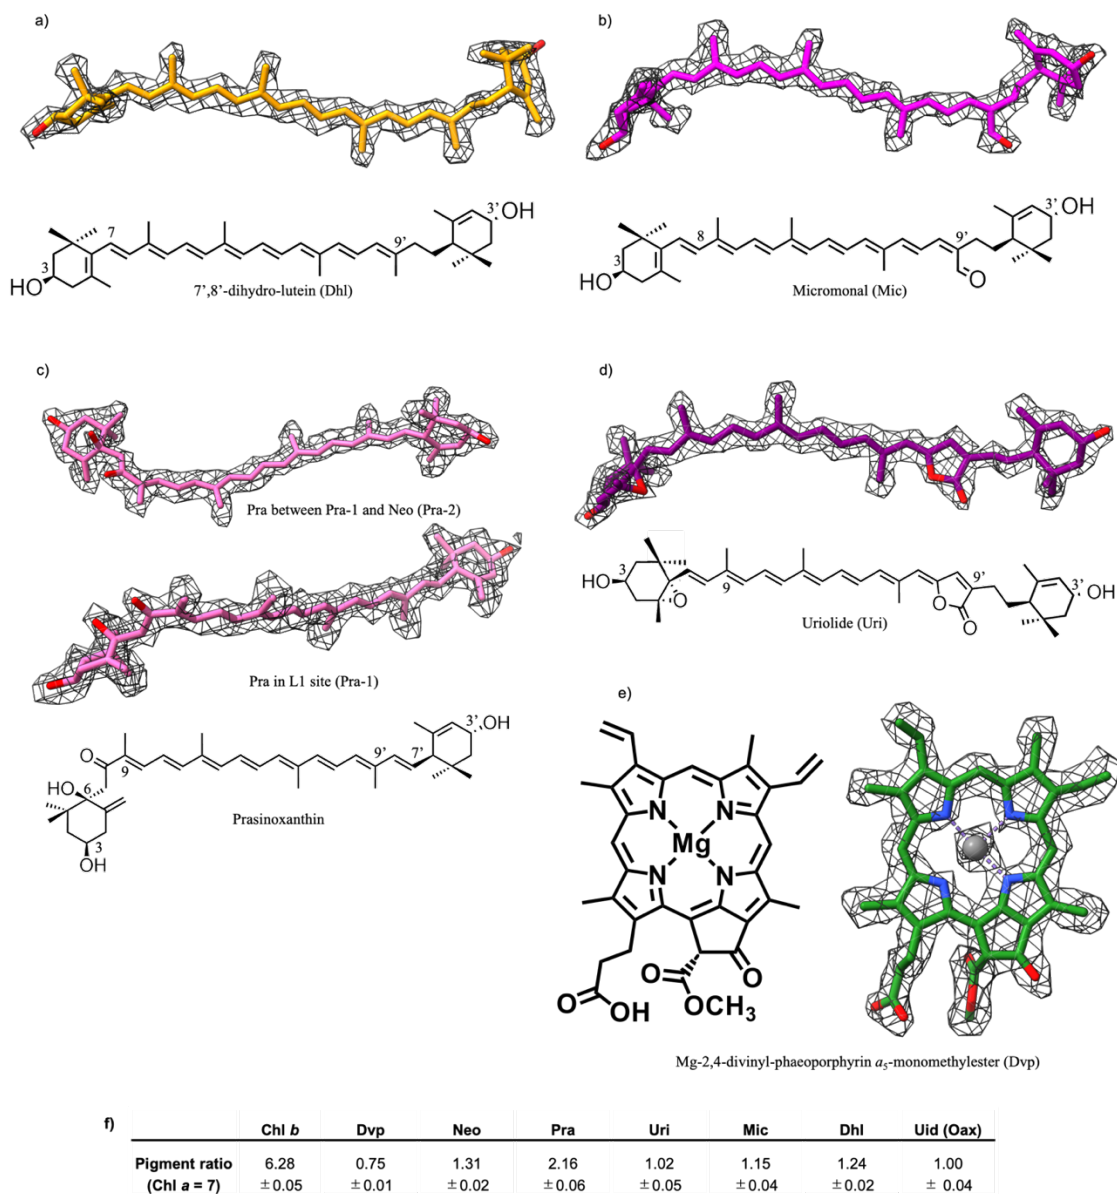

**Fig. S2. Chemical structure and 3D-structure with electron potential map for unique pigments in Lhcp and the pigment composition in Lhcp.** The structures of 7',8'-dihydrolutein (Dhl; a), micromonal (Mic; b), two prasinoxanthin molecules in different binding sites (Pra-1 and Pra-2; c), uriolide (Uri; d), and Mg-2,4-divinyl-phaeoporphyrin *a*<sub>5</sub>-monomethyl ester (Dvp; e) were shown. Pigment composition of Lhcp was shown as the relative number of molecules per 7 Chl *a* molecules, determined using ultra-performance liquid chromatography (f). Each mean value of three biological replicates was shown with standard errors. The structural models with the density were created using ChimeraX<sup>[10]</sup>.

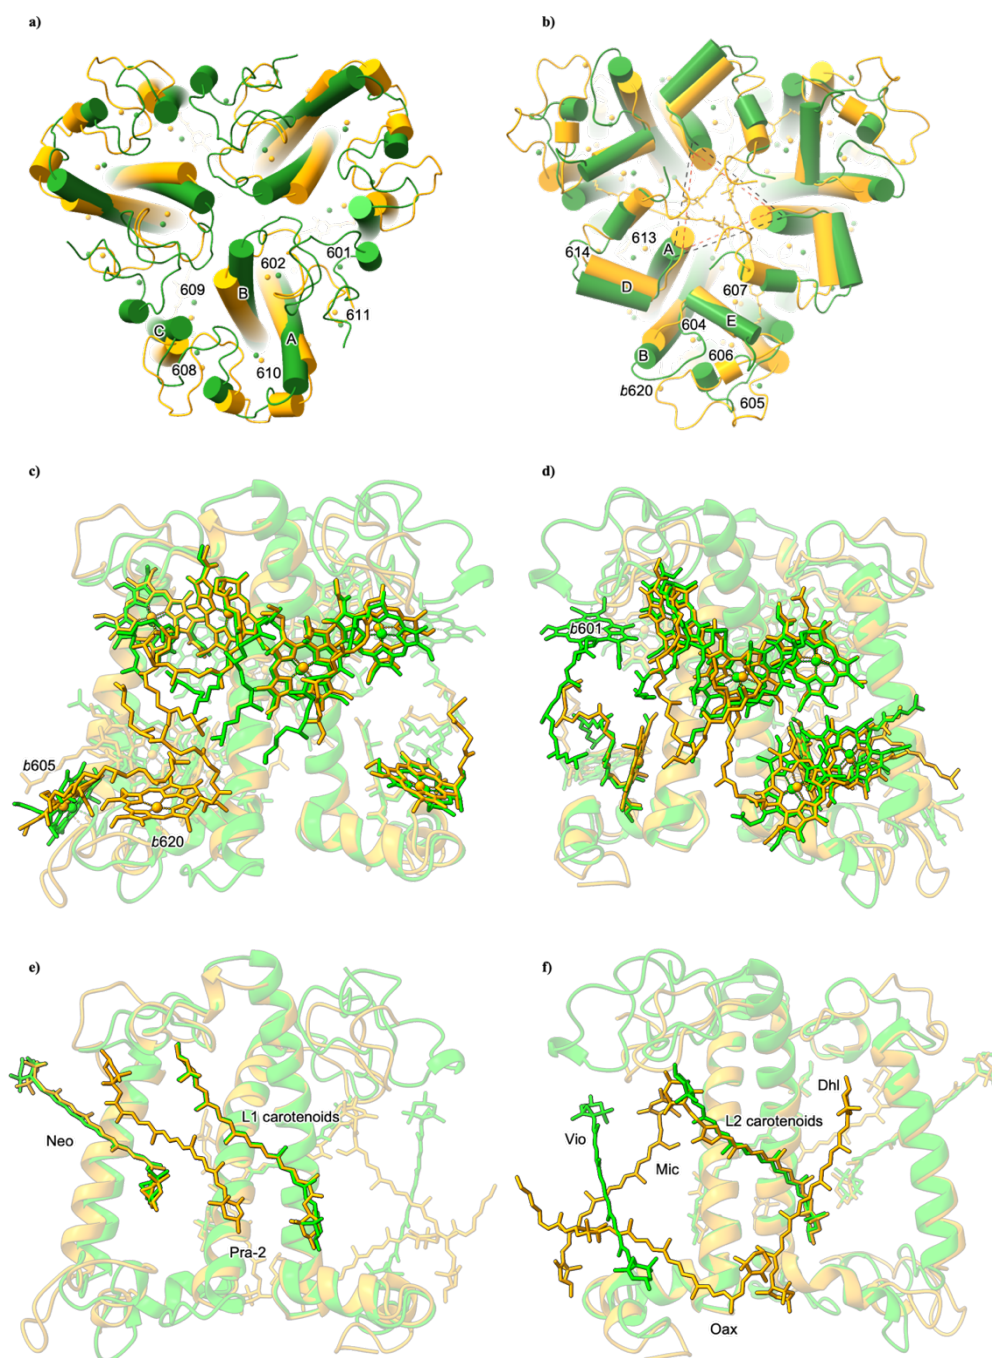

**Fig. S3. Superposed structure between spinach LHCII (1RWT, green) and Lhcp (orange) with highlighting helices (a, b), chlorophylls (c, d), and carotenoids (e, f).** The views of trimer from stromal (a) and luminal (c) planes, and views of a monomer from the peripheral side (c, e) and the internal side (d, f) were illustrated. Mg atoms of Chl molecules and Oax are displayed for clarity (a). Dotted line in (b) connects Gly-202 of LHCII (black) or Gln-203 of Lhcp (red) between adjacent monomers, representing an inward shift of helices A by approximately 3 Å. The structural models were created using ChimeraX<sup>[10]</sup>.



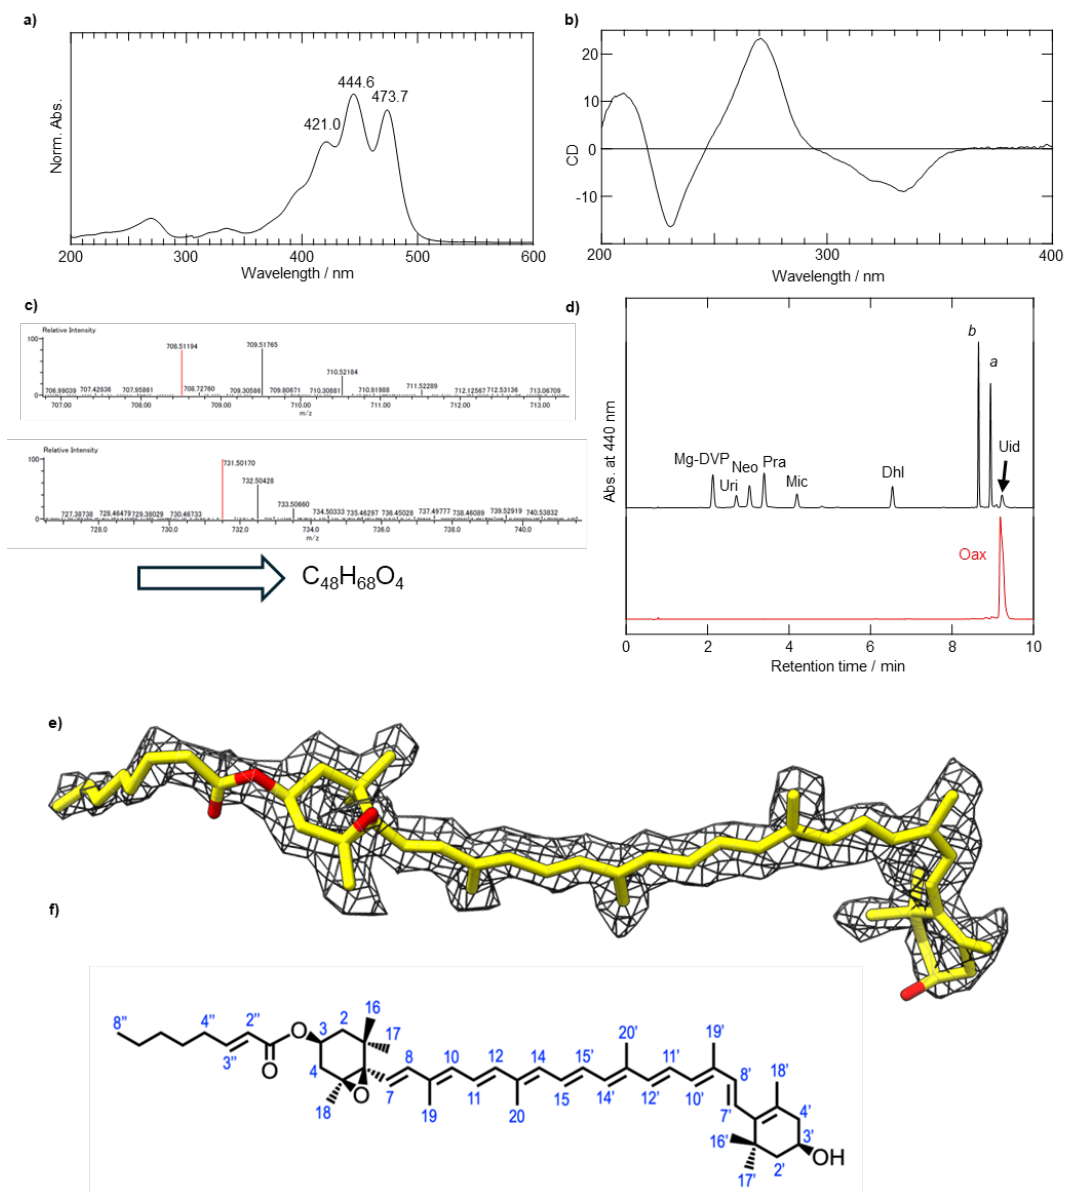

**Fig. S4. Structural determination of a novel 3-octenoyloxy-8-s-*cis*-antheraxanthin B in Lhcp.** Absorption (a) and circular dichroism (CD; b) spectra of isolated Oax were measured in hexane. The high-resolution mass spectrometry (c) revealed three signals without and with Na<sup>+</sup> ion, indicating the chemical formula of C<sub>48</sub>H<sub>68</sub>O<sub>4</sub>. The isolated Oax was analyzed by HPLC (d) and compared with the extract from Lhcp complex. Based on these results, the absolute structure was determined to be 3-octenoyl antheraxanthin B, although the position of the double bond in the octenoyl group is tentative (Supporting Information Text 1). The unusual 8'-*s-cis* configuration was determined based on the electron potential map.

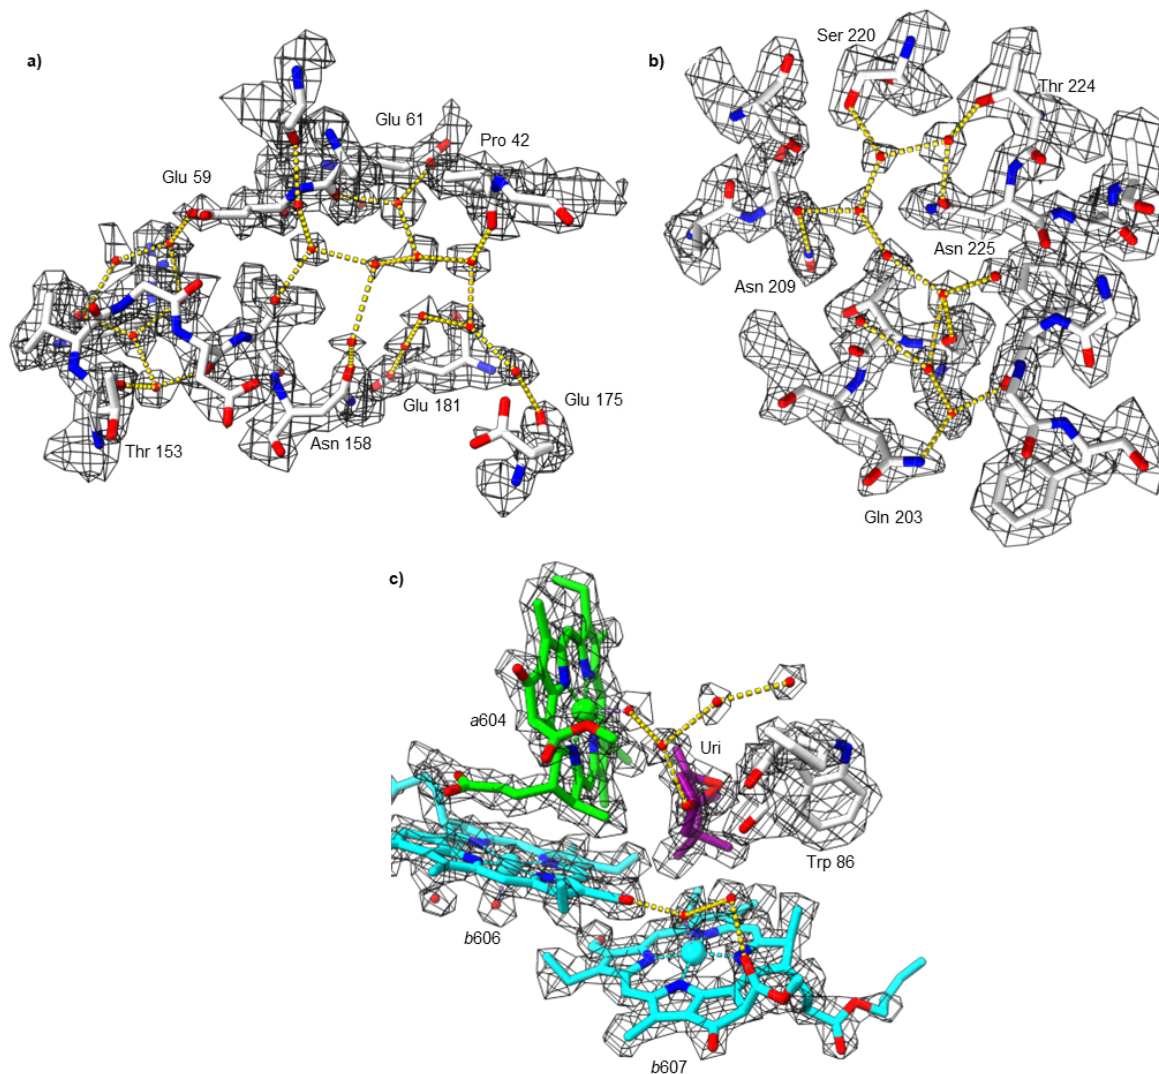

**Fig. S5. The hydrogen bonded water clusters on the stromal (a) and luminal (b and c) sides of Lhcp trimer.**

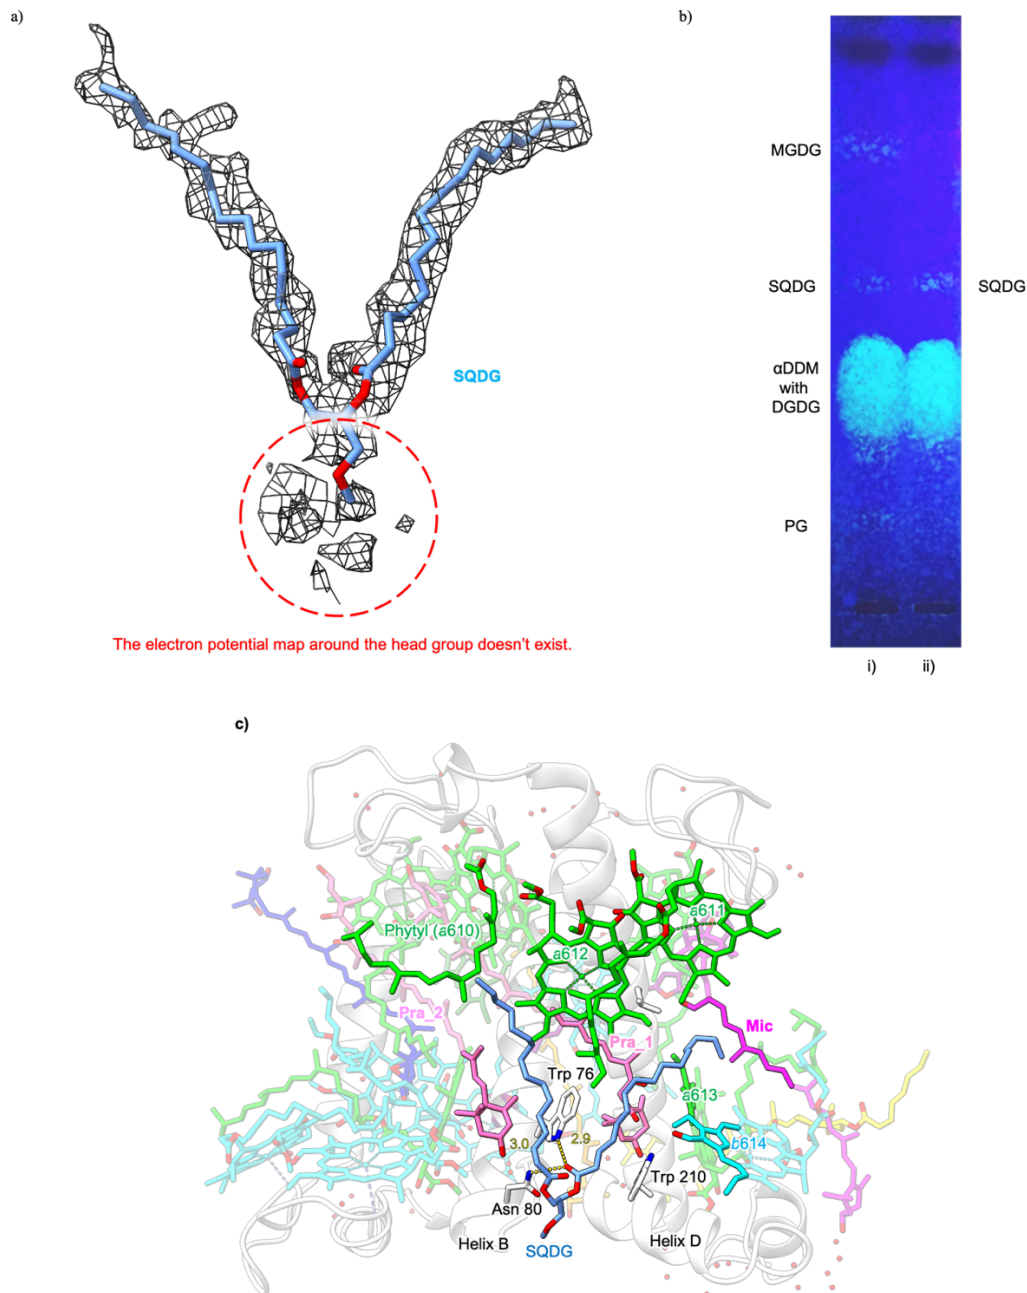

**Fig. S6. Determination of SQDG molecule in Lhcp by electron potential map (a) and TLC (b), and stabilization of SQDG in Lhcp (c).** Lipid compositions of Lhcp were analyzed using thin-layer chromatography (TLC) to compare the Lhcp trimer isolated using sucrose density gradient (i) with Lhcp trimer subsequently purified using anion exchange chromatography. A clear SQDG band was identified, and at the same time, the MGDG and PG bands disappeared. Two hydrogen bonds with residues Asn-80 and Trp-76 stabilize the acyl carbonyl of SQDG, and hydrophobic environments stabilize the hydrocarbon tails (c). MGDG, Monogalactosyl diacylglycerol; DGDG, Digalactosyl-diacylglycerol; SQDG, sulfoquinovosyl diacylglycerol; PG, phosphatidyl glycerol.

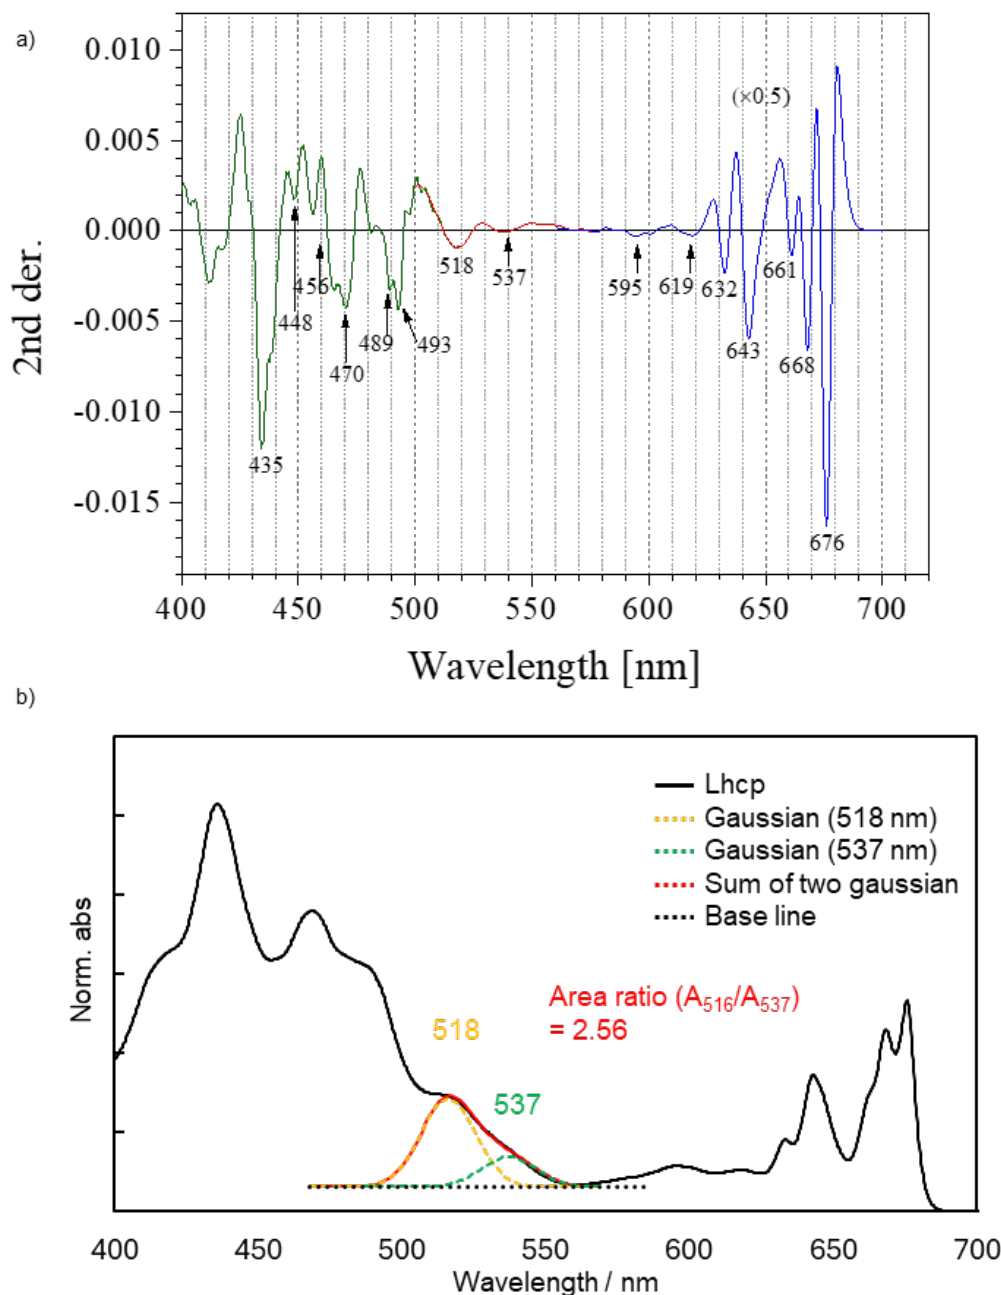

**Fig. S7. Second derivative spectrum of the 77 K absorption spectrum (a) and simulation of the green light absorption cross section (b).** The 77 K absorption spectrum was divided into three regions, indicated by green, red, and blue, and the second derivative spectrum of each region was calculated using Origin Pro 2023 software. The region indicated by the blue line was multiplied by 0.5. Simulation of the absorption cross section of the green region was performed manually using two Gaussian functions with peaks at 518 and 537 nm.

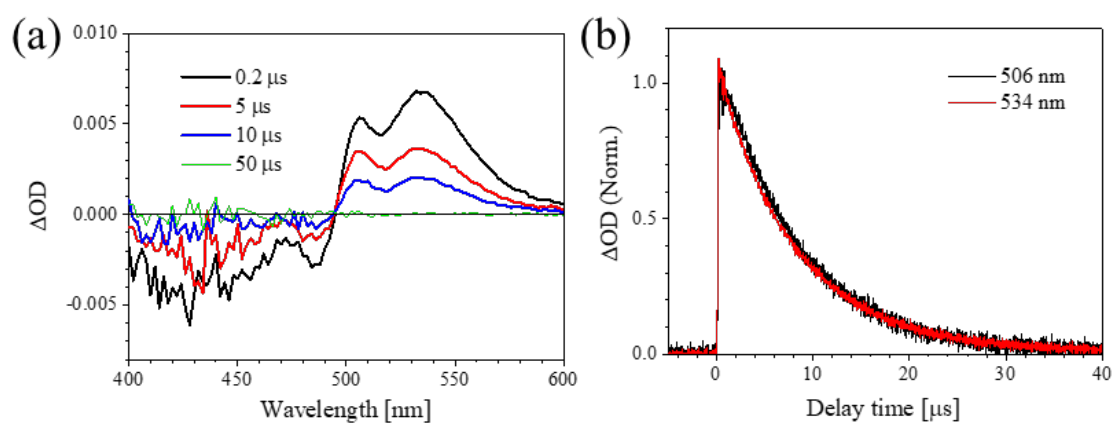

**Fig. S8. Nano-second time-resolved absorption analysis of Lhcp trimer.** Transient absorption spectra at selected delay time (a) and decay kinetics at 506 nm and 534 nm (b). Lhcp was excited at 672 nm, corresponding to the  $Q_y$  band of Chl *a*.

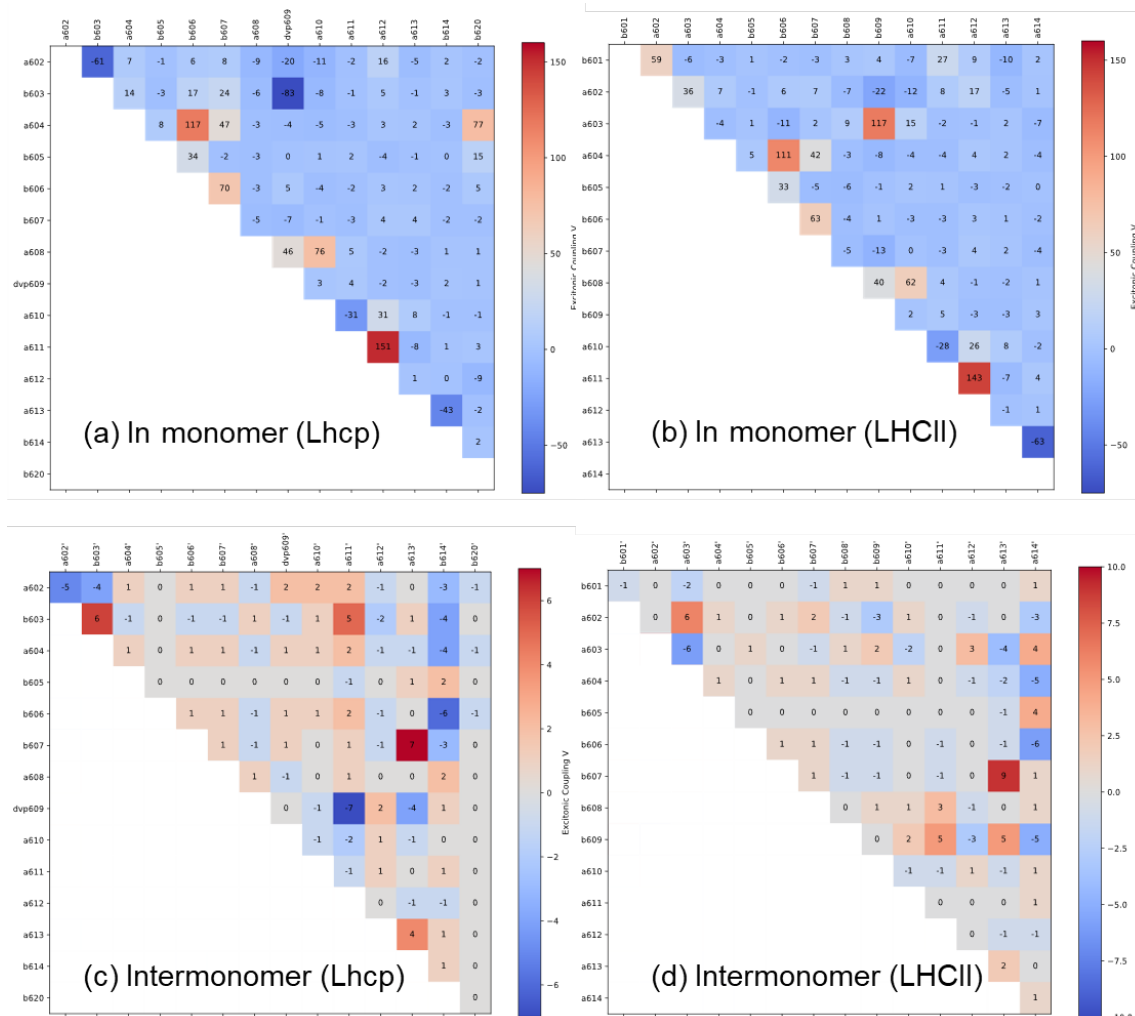

**Fig. S9. Excitonic coupling lists of Lhcp and LHCI calculated using the equation described by Amerongen and Grondelle [6]. See Supplementary information 2 for the details.**

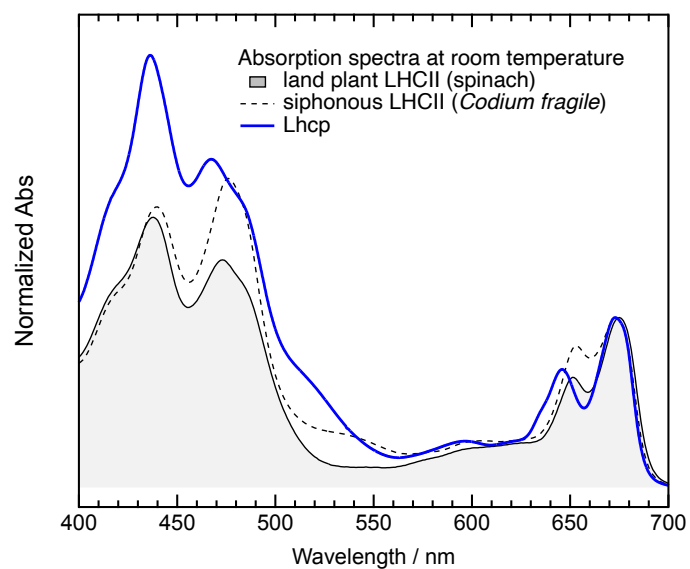

**Fig. S10. Comparison of absorption spectra.** Land plant LHCII (*Spinacia oleracea*, filled with pale gray, adapted from Seki et al. 2024 <sup>[11]</sup> with some modifications), siphonous LHCII (*Codium fragile*, black broken line, adapted from Seki et al. 2022 <sup>[12]</sup> with some modifications), and Lhcp (blue thick solid line) normalized at the  $Q_y$  peak maxima were shown.

165 **Table S1.** Cryo-EM data collection, refinement and validation statistics.

|                                        | Lhcp      |
|----------------------------------------|-----------|
| PDB                                    | 9UC6      |
| EMDB                                   | EMD-64036 |
| Magnification                          | 60,000    |
| Voltage (kV)                           | 300       |
| Electron exposure (e-/Å <sup>2</sup> ) | 80        |
| Defocus range (nm)                     | 700-2,200 |
| Pixel size (Å)                         | 0.859     |
| Symmetry imposed                       | C3        |
| Initial particle images (no.)          | 5,408,616 |
| Final particle images (no.)            | 1,291,024 |
| Map resolution (Å)                     | 1.94      |
| FSC threshold                          | 0.143     |
| <b>Refinement</b>                      |           |
| Initial model used (PDB code)          | 8HG5      |
| Model composition                      |           |
| Non-hydrogen atoms                     | 8379      |
| Protein residues                       | 600       |
| Ligands                                | 69        |
| R.m.s. deviations                      |           |
| Bond lengths (Å)                       | 0.010     |
| Bond angles (°)                        | 1.698     |
| Validation                             |           |
| MolProbity score                       | 1.24      |
| Clashscore                             | 4.67      |
| Rotamer outlier (%)                    | 0.22      |
| Ramachandran plot                      |           |
| Favored (%)                            | 99.00     |
| Allowed (%)                            | 1.00      |
| Disallowed (%)                         | 0.00      |

166



167  
168  
169  
170  
171  
172

173

**Table S3. Pigment composition differences between LHCII, previous Lhcp and this Lhcp with each axial ligand information.** C=O indicates the carbonyl group from main chain.

|     | LHCII<br>(1RWT)              | Axial<br>ligand | Lhcp<br>(8HG4)            | Lhcp<br>(9UC6)                                 | Axial<br>ligand |
|-----|------------------------------|-----------------|---------------------------|------------------------------------------------|-----------------|
| 601 | <i>b</i>                     | C=O (Tyr 24)    |                           |                                                |                 |
| 602 | <i>a</i>                     | Glu 65          | <i>a</i>                  | <i>a</i>                                       | Glu 61          |
| 603 | <i>a</i>                     | His 68          | <i>a</i>                  | <i>b</i>                                       | His 64          |
| 604 | <i>a</i>                     | Water           | <i>a</i>                  | <i>a</i>                                       | Water           |
| 605 | <i>b</i>                     | C=O (Val 119)   | <i>b</i>                  | <i>b</i>                                       | C=O (Leu 112)   |
| 606 | <i>b</i>                     | Water           | <i>b</i>                  | <i>b</i>                                       | Water           |
| 607 | <i>b</i>                     | Water           | <i>b</i>                  | <i>b</i>                                       | Water           |
| 608 | <i>b</i>                     | Water           | <i>b</i>                  | <i>a</i>                                       | Water           |
| 609 | <i>b</i>                     | Glu 139         | Mg-DVP                    | Mg-DVP                                         | Glu 137         |
| 610 | <i>a</i>                     | Glu 180         | <i>a</i>                  | <i>a</i>                                       | Glu 181         |
| 611 | <i>a</i>                     | PG              | <i>a</i>                  | <i>a</i>                                       | Glu 37          |
| 612 | <i>a</i>                     | Asn 183         | <i>a</i>                  | <i>a</i>                                       | His 184         |
| 613 | <i>a</i>                     | Gln 197         | <i>a</i>                  | <i>a</i>                                       | Gln 198         |
| 614 | <i>a</i>                     | His 212         | <i>a</i>                  | <i>b</i>                                       | His 213         |
| 620 |                              |                 | <i>b</i>                  | <i>b</i>                                       | C=O (Pro 106)   |
| L1  | Lutein                       |                 | Dihydrolutein             | Prasinoxanthin                                 |                 |
| L2  | Lutein                       |                 | Dihydrolutein             | Uriolide                                       |                 |
| N1  | 9'- <i>Cis</i><br>neoxanthin |                 | 9'- <i>Cis</i> neoxanthin | 9'- <i>Cis</i> neoxanthin                      |                 |
| V1  | Violaxanthin                 |                 |                           |                                                |                 |
| P2  |                              |                 | Prasinoxanthin            | Prasinoxanthin                                 |                 |
| M1  |                              |                 | Dihydrolutein             | Micromonal                                     |                 |
| D1  |                              |                 | Dihydrolutein             | Dihydrolutein                                  |                 |
| O1  |                              |                 | Prasinoxanthin            | 3-Octenoyl-8'- <i>s-cis</i><br>antheraxantin B |                 |

## SI References

1. Seki, S., Yamano, Y., Oka, N., Kamei, Y. & Fujii, R. Discovery of a novel siphonaxanthin biosynthetic precursor in *Codium fragile* that accumulates only by exposure to blue-green light. *FEBS Lett* **596**, 1544–1555 (2022).
2. Britton, G., Liaaen-Jensen, S., Pfander, H. Eds. *Carotenoids Handbook*, (Springer Basel AG, 2004).
3. Buchecker, R. & Noack, K. “Circular Dichroism” in *Carotenoids Vol. 1B: Spectroscopy*, Britton, G., Liaaen-Jensen, S. & Pfander, H. Eds., (Birkhäuser Verlag, 1995), Chapter 3, pp. 63–116.
4. Marki-Fischer, E., Buchecker, R. & Eugster, C. H. Absolute Configuration of Antheraxanthin, ‘cis-Artheraxanthin’ and of the Stereoisomeric Mutatdxanthins. *Helv. Chim. Acta* **65** (7): 2198-2211 (1982).
5. Yoshii, Y., Takaichi, S., Maoka, T., Handa, S. & Inoue, I. Chacterization of two unique carotenoid fatty acid esters from *Pterosperma cristatum* (prasinophyceae, chlorophyta). *J. Phycol.* **38** (2), 297-303 (2002).
6. Van Amerongen, H. & Van Grondelle, R. Understanding the energy transfer function of LHCII, the major light-harvesting complex of green plants. *J. Phys. Chem. B* **105**, 604–617 (2001).
7. Jeffrey, S. W., Mantoura, R. F. C. & Bjornland, T. “Data for the identification of 47 key phytoplankton pigments” in *Phytoplankton Pigments in Oceanography: Guidelines to Modern Methods*, Jeffrey, S. W., Mantoura, R. F. C. & Wright, S. W. Eds., (UNESCO Publishing, 1997), pp. 488–489.
8. Knox, R. S. Dipole and oscillator strengths of chromophores in solution, *Photochem. Photobiol.* **77**: 492–496 (2003).
9. Krueger, B. P., Lampoura, S. S., van Stokkum, I. H.M., Papagiannakis, E., Salverda, J. M., Gradinaru, C. C., Rutkauskas, D.; Hiller, R. G., van Grondelle, R. “Energy transfer in the peridinin chlorophyll-a protein of *Amphidinium carterae* studied by polarized transient absorption and target analysis”, *Biophys. J.* **80**:2843-2855 (2001).
10. Pettersen, E. F., Goddard, T. D., Huang, C. C., Couch, G. S., Daniel M Greenblatt, D. M., Meng, E. C. & Ferrin, T. E. UCSF Chimera - A visualization system for exploratory research and analysis. *J. Comput. Chem.* **25**, 1605–1612 (2004).
11. Seki, S., Miyata, T., Norioka, N., Tanaka, H., Kurisu, G., Namba, K., Fujii, R. Structure-based validation of recombinant light-harvesting complex II. *PNAS Nexus* **3**, 405 (2024).
12. Seki, S., Nakaniwa, T., Castro-Hartmann, P., Sader, K., Kawamoto, A., Tanaka, H., Qian, P., Kurisu, G., Fujii, R. Structural insights into blue-green light utilization by marine green algal light harvesting complex II at 2.78 Å. *BBA Advances* **2**, 100064 (2022).
